# Supplementary material for: Long-Term Moderate Oxidative Stress Decreased Ovarian Reproductive Function by Reducing Follicle Quality and Progesterone Production
Source: PLoS One. 2016 Sep 27;11(9):e0162194. doi: 10.1371/journal.pone.0162194 (PMC5038974; doi:10.1371/journal.pone.0162194)
Supplement: S7 Table — The counting of ovarian primordial follicles showed no significant difference. (XLSX) [file pone.0162194.s009.xlsx]

## Sheet: Sheet1
Sample	Number of primordial follicles
NC-1	570	OI-1	260
NC-2	410	OI-2	580
NC-3	380	OI-3	200
NC-4	600	OI-4	350
NC-5	595	OI-5	370
NC-6	375	OI-6	550
NC-7	490	OI-7	390
NC-8	510	OI-8	370
NC-9	430	OI-9	420
NC-10	550	OI-10	340

## Sheet: Sheet2
O3-10cycles①	50
O3-10cycles②
O3-10cycles③
O3-10cycles④
O3-10cycles①
O3-10cycles②
O3-10cycles③
O3+NS-10cycles①
O3+NS-10cycles③
NS-10cycles①
NS-10cycles②
NS-10cycles③
blank-10cycles①
blank-10cycles②
blank-10cycles③
			570	250	230	95
			410	200		170
			380	255	250	135
						215
I			595		220	310
					600	295
					380	325
					655	240
O3
O3+I
